# Supplementary material
Source: publisher figshare collection journal article supplement (https://asha.figshare.com/articles/dataset/_/21183247)
Supplement: Supplementary file 1 [file 1]

**Supplemental Material S1.** Two tables are included that provide the diagnostic accuracy metrics for all language sample measures and age groups and the reference measures used across all reviewed studies.

**Table S1.** Diagnostic accuracy of language sample analysis measures.

| Measure                                                     | Age                                       | Task                                | Sensitivity | Specificity | Overall |
|-------------------------------------------------------------|-------------------------------------------|-------------------------------------|-------------|-------------|---------|
| <b>Mainstream English speakers</b>                          |                                           |                                     |             |             |         |
| <b>Morphosyntax: Accuracy</b>                               |                                           |                                     |             |             |         |
| DSS Sentence Point <sup>a</sup>                             | 4;0–4;11                                  | Play                                | 93%         | 94%         | —       |
|                                                             | 5;0–5;10                                  | Play                                | 100%        | 100%        | —       |
| Errors per C-unit <sup>b</sup>                              | 6                                         | Narrative tell                      | 91%         | 82%         | 85%     |
|                                                             | 8                                         | Narrative tell                      | 94%         | 80%         | 84%     |
| Finite Verb Morphology Composite <sup>a,b,c,d,e,f,g,h</sup> | 3;0–3;11 <sup>c</sup>                     | Play<br>(50 utterances)             | 67%         | 100         | 83%     |
|                                                             | 3;0–3;11 <sup>c</sup>                     | Play<br>(100 utterances)            | 83%         | 89%         | 86%     |
|                                                             | 3;0–3;11 <sup>c</sup><br>(SPELT < 87)     | Play<br>(100 utterances)            | 100%        | 89%         | 94%     |
|                                                             | 3;0–3;6 <sup>c</sup>                      | Play<br>(100 utterances)            | 100%        | 75%         | 88%     |
|                                                             | 3;6–3;11 <sup>c</sup>                     | Play<br>(100 utterances)            | 70%         | 100%        | 85%     |
|                                                             | 3;7–5;9 <sup>d</sup>                      | Conversation<br>Picture description | 84%         | 100%        | —       |
|                                                             | 4;0–4;11 <sup>a</sup>                     | Play                                | 93%         | 94%         | —       |
|                                                             | 5;0–5;10 <sup>a</sup>                     | Play                                | 91%         | 93%         | —       |
|                                                             | 4;0–4;6 <sup>e</sup>                      | Play                                | 100%        | 100%        | —       |
|                                                             | 5;0–5;6 <sup>e</sup>                      | Play                                | 92%         | 93%         | —       |
|                                                             | 5;5–9;9 <sup>f</sup>                      | Conversation<br>Expository          | 50%         | 86%         | 68%     |
|                                                             | 5;11–6;3 <sup>g</sup><br>(MLU < −1 SD)    | Play                                | 26          | 90          | —       |
|                                                             | 5;11–6;3 <sup>g</sup><br>(PPVT-R < −1 SD) | Play                                | 35          | 92          | —       |
|                                                             | 5;11–6;3 <sup>g</sup><br>(NWR < −1 SD)    | Play                                | 30          | 91          | —       |
|                                                             | 4;0–4;11 <sup>h</sup>                     | Narrative tell                      | 92%         | 94%         | 94%     |
|                                                             | 5;0–5;11 <sup>h</sup>                     | Narrative tell                      | 100%        | 90%         | 92%     |
|                                                             | 6;0–6;11 <sup>b,h</sup>                   | Narrative tell                      | 82%         | 90%         | 89%     |
|                                                             | 7;0–7;11 <sup>h</sup>                     | Narrative tell                      | 85%         | 86%         | 86%     |
|                                                             | 8;0–8;11 <sup>b,h</sup>                   | Narrative tell                      | 76%         | 80%         | 79%     |
|                                                             | 9;0–9;11 <sup>h</sup>                     | Narrative tell                      | 80%         | 76%         | 77%     |
| Grammaticality & Utterance Length Instrument <sup>i</sup>   | 4;0–6;11                                  | Narrative retell                    | 83%         | 92%         | —       |
| Noun Morphology Composite <sup>d,f</sup>                    | 3;7–5;9 <sup>d</sup>                      | Conversation<br>Picture description | 79%         | 100%        | —       |
|                                                             | 5;5–9;9 <sup>f</sup>                      | Conversation<br>Expository          | 54%         | 86%         | 70%     |

| Measure                                                 | Age                                 | Task                       | Sensitivity | Specificity | Overall |
|---------------------------------------------------------|-------------------------------------|----------------------------|-------------|-------------|---------|
| Percent Grammatical Utterances/C-units <sup>b,j,k</sup> | 3;0–3;11 <sup>j</sup>               | Picture description        | 100%        | 88%         | —       |
|                                                         | 4;0–4;11 <sup>k</sup>               | Narrative tell             | 83%         | 96%         | 94%     |
|                                                         | 5;0–5;11 <sup>k</sup>               | Narrative tell             | 100%        | 82%         | 86%     |
|                                                         | 6;0–6;11 <sup>b,k</sup>             | Narrative tell             | 82%         | 90%         | 89%     |
|                                                         | 7;0–7;11 <sup>k</sup>               | Narrative tell             | 92%         | 88%         | 89%     |
|                                                         | 8;0–8;11 <sup>b,k</sup>             | Narrative tell             | 88%         | 84%         | 85%     |
|                                                         | 9;0–9;11 <sup>k</sup>               | Narrative tell             | 90%         | 90%         | 90%     |
| Percent Sentence Point <sup>l</sup>                     | 3;0–3;11                            | Picture description        | 100%        | 82%         | —       |
| Proportion ‘restricted’ utterances <sup>l</sup>         | 8–10                                | Narrative tell             | 83%         | 88%         | —       |
| Percent Verb Tense Usage <sup>j</sup>                   | 3;0–3;11                            | Picture description        | 100%        | 82%         | —       |
| <b>Morphosyntax: Proficiency</b>                        |                                     |                            |             |             |         |
| DSS Tota <sup>a</sup>                                   | 4;0–4;11                            | Play                       | 79%         | 94%         | —       |
|                                                         | 5;0–5;10                            | Play                       | 72%         | 87%         | —       |
| Mean tense/agreement <sup>a</sup>                       | 4;0–4;11                            | Play                       | 79%         | 81%         | —       |
|                                                         | 5;0–5;10                            | Play                       | 64%         | 80%         | —       |
| Mean Top 5 tense/agreement <sup>a</sup>                 | 4;0–4;11                            | Play                       | 71%         | 69%         | —       |
|                                                         | 5;0–5;10                            | Play                       | 73%         | 87%         | —       |
| Tense Marker Total <sup>c</sup>                         | 4;0–4;6                             | Play                       | 83%         | 87%         | —       |
|                                                         | 5;0–5;6                             | Play                       | 77%         | 80%         | —       |
| Tense/Agreement Productivity Score <sup>c,e</sup>       | 3;0–3;5 <sup>c</sup>                | Play<br>(100 utterances)   | 88%         | 88%         | 88%     |
|                                                         | 3;6–3;11 <sup>c</sup>               | Play<br>(100 utterances)   | 90%         | 80%         | 85%     |
|                                                         | 3;0–3;11 <sup>c</sup>               | Play<br>(50 utterances)    | 94          | 50          | 72      |
|                                                         | 3;0–3;11 <sup>c</sup>               | Play<br>(100 utterances)   | 89%         | 78%         | 83      |
|                                                         | 3;0–3;11 <sup>c</sup><br>SPELT < 87 | Play<br>(100 utterances)   | 100%        | 100%        | 100%    |
|                                                         | 4;0–4;6 <sup>e</sup>                | Play                       | 67%         | 87%         | —       |
|                                                         | 5;0–5;6 <sup>e</sup>                | Play                       | 80%         | 80%         | —       |
|                                                         |                                     |                            |             |             |         |
| <b>Morphosyntax: Length</b>                             |                                     |                            |             |             |         |
| Clauses per Sentence <sup>m</sup>                       | 3;0–7;11                            | Conversation               | 83%         | 91%         | —       |
| MLU (morphemes) <sup>d,f</sup>                          | 3;7–5;9 <sup>d</sup>                | Conversation               | 95%         | 89%         | —       |
|                                                         |                                     | Picture description        |             |             |         |
|                                                         | 5;5–9;9 <sup>f</sup>                | Conversation<br>Expository | 72%         | 80%         | 76%     |
| MLU (SUGAR) <sup>m</sup>                                | 3;0–7;11                            | Conversation               | 86%         | 86%         | —       |
| Words per Sentence <sup>m</sup>                         | 3;0–7;11                            | Conversation               | 83%         | 84%         | —       |
| <b>Semantics</b>                                        |                                     |                            |             |             |         |
| Moving Average Type-Token Ratio <sup>n</sup>            | 4–9                                 | Narrative tell             | 26%         | 88%         | —       |
| Number of Different Words (200w) <sup>n</sup>           | 4–9                                 | Narrative tell             | 20%         | 90%         | —       |
| Number of Different Words (41u) <sup>n</sup>            | 4–9                                 | Narrative tell             | 42%         | 91%         | —       |
| Number of Different Words (nar) <sup>n</sup>            | 4–9                                 | Narrative tell             | 34%         | 92%         | —       |

| Measure                                                                                                    | Age                  | Task                                    | Sensitivity | Specificity | Overall |
|------------------------------------------------------------------------------------------------------------|----------------------|-----------------------------------------|-------------|-------------|---------|
| Total Number of Words <sup>m</sup>                                                                         | 3;0–7;0              | Conversation                            | 86%         | 85%         | —       |
| <b>Pragmatics/Discourse</b>                                                                                |                      |                                         |             |             |         |
| Story Grammar <sup>o</sup>                                                                                 | 4;0–9;11             | Narrative retell                        | 70%         | 84%         | 81%     |
| TNW + Turns + References + Expansions <sup>p</sup>                                                         | 8;4–13;2             | Expository<br>(Map task)                | 75%         | 60%         | —       |
| <b>Composite Models</b>                                                                                    |                      |                                         |             |             |         |
| 10 SALT measures <sup>q</sup>                                                                              | 3;0–13;6             | Conversation                            | 69%         | 84%         | —       |
|                                                                                                            | 3;0–5;11             | Conversation                            | 87%         | 87%         | —       |
|                                                                                                            | 6;0–9;11             | Conversation                            | 80%         | 85%         | —       |
|                                                                                                            | 10;0–13;6            | Conversation                            | 77%         | 82%         | —       |
| Cohesive ties + % grammatical T-units + subordinate clauses/T-unit + words/subordinate clause <sup>r</sup> | 7;6–10;6             | Narrative retell                        | —           | —           | 98%     |
|                                                                                                            | 8;6–12;6             | Narrative retell                        | —           | —           | 79%     |
|                                                                                                            | 9;0–11;4             | Narrative retell                        | —           | —           | 83%     |
| MLU + Clauses Per Sentence <sup>m</sup>                                                                    | 3;0–7;11             | Conversation                            | 97%         | 82%         | —       |
| MLU + lexical diversity <i>D</i> + age <sup>s</sup>                                                        | 2;0–4;0              | Play                                    | 86%         | 91%         | —       |
| MLU-m + NDW + IPSyn total <sup>t</sup>                                                                     | 5;5–6;7              | Conversation                            | —           | —           | 74%     |
| MLU + % structural errors + age <sup>u</sup>                                                               | 2;6–6;11             | Play                                    | 81%         | 83%         | —       |
| Noun Composite + MLU <sup>d,f</sup>                                                                        | 5;5–9;9 <sup>f</sup> | Conversation<br>Expository              | 72%         | 84%         | 78%     |
|                                                                                                            | 3;7–5;9 <sup>d</sup> | Conversation<br>Picture description     | 89%         | 100%        | —       |
| Noun Composite + Verb Composite <sup>d,f</sup>                                                             | 5;5–9;9 <sup>f</sup> | Conversation<br>Expository              | 62%         | 86%         | 74%     |
|                                                                                                            | 3;7–5;9 <sup>d</sup> | Conversation<br>Picture description     | 84%         | 100%        | —       |
| Noun Composite + Verb Composite + MLU <sup>d,f</sup>                                                       | 5;5–9;9 <sup>f</sup> | Conversation<br>Expository              | 72%         | 88%         | 80%     |
|                                                                                                            | 3;7–5;9 <sup>d</sup> | Conversation<br>Picture description     | 89%         | 95%         | —       |
| Unmarked Verbs + Verb Types <sup>v</sup>                                                                   | 3;4–6;11             | Play                                    | 89%         | 90%         | —       |
|                                                                                                            |                      | Picture description<br>Narrative retell |             |             |         |
| Verb Composite + MLU <sup>d,f</sup>                                                                        | 5;5–9;9 <sup>f</sup> | Conversation<br>Expository              | 74%         | 84%         | 79%     |
|                                                                                                            | 3;7–5;9 <sup>d</sup> | Conversation<br>Picture description     | 95%         | 95%         | —       |
| VP errors + Stage 1 Utterances + Age + 3 – element NP <sup>w</sup>                                         | 2;0–4;2              | Play                                    | 91%         | 92%         | 92%     |
| <b>African American English (AAE) and Southern White English (SWE) speakers</b>                            |                      |                                         |             |             |         |
| <b>Morphosyntax: Accuracy</b>                                                                              |                      |                                         |             |             |         |
| Nonmainstream patterns <sup>x</sup>                                                                        |                      |                                         |             |             |         |
| Full model (35 patterns)                                                                                   | 4–6                  | Play                                    | 87%         | 94%         | 90%     |
| Reduced model (4 patterns)                                                                                 | 4–6                  | Play                                    | 74%         | 90%         | 84%     |

| Measure                                                                  | Age      | Task              | Sensitivity | Specificity | Overall |
|--------------------------------------------------------------------------|----------|-------------------|-------------|-------------|---------|
| SWE-specific model (5 patterns)                                          | 4–6      | Play              | 87%         | 95%         | —       |
| SAAE-specific model (3 patterns)                                         | 4–6      | Play              | 75%         | 82%         | —       |
| Tense & Agreement Forms <sup>y</sup>                                     |          |                   |             |             |         |
| Unmodified Scoring                                                       | 5        | Play              | 70%         | 64%         | 67%     |
| Modified Scoring                                                         | 5        | Play              | 72%         | 74%         | 73%     |
| Strategic Scoring                                                        | 5        | Play              | 43%         | 64%         | 54%     |
| Past Tense (Strategic)                                                   | 5        | Play              | 70%         | 85%         | 77%     |
| Past Tense (Strategic): SWE                                              | 5        | Play              | 89%         | 89%         | 89%     |
| Past Tense (Strategic): AAE                                              | 5        | Play              | 83%         | 77%         | 80%     |
| <b>Morphosyntax: Proficiency</b>                                         |          |                   |             |             |         |
| DSS Total <sup>z</sup>                                                   | < 6      | Play              | 63%         | 100%        | —       |
| IPSyn Total <sup>z</sup>                                                 | < 6      | Play              | 45%         | NR          | —       |
| <b>Bilingual English Speakers</b>                                        |          |                   |             |             |         |
| <b>Spanish/English Bilinguals</b>                                        |          |                   |             |             |         |
| MLU + Grammaticality + Number of Different Words + % mazes <sup>aa</sup> | 5;3–8    | Narrative retell  | —           | —           | 83%     |
| <b>Cantonese/English Bilinguals</b>                                      |          |                   |             |             |         |
| MLU + IPSyn + Lexical diversity <sup>ab</sup>                            | 3;8–5;11 | Conversation play | 78%         | 78%         | 78%     |

*Note.* DSS = Developmental Sentence Scoring; IPSyn = Index of Productive Syntax; MLU = mean length of utterance; SUGAR = Sampling Utterances and Grammatical Analysis Revised; TNW = total number of words; SALT = Systematic Analysis of Language Transcripts; IPSyn = Index of Productive Syntax; NDW = number of different words; VP = verb phrase. NP = noun phrase; SWE = Southern White English; SAAE = Southern African American English; NR = not reported. <sup>a</sup>Souto et al., 2014. <sup>b</sup>Guo & Schneider, 2016. <sup>c</sup>Guo & Eisenberg, 2014. <sup>d</sup>Bedore & Leonard, 1998. <sup>e</sup>Gladfelter & Leonard, 2013. <sup>f</sup>Moyle et al., 2011. <sup>g</sup>Rudolph et al., 2019. <sup>h</sup>Guo et al., 2020. <sup>i</sup>Castilla-Earls & Fulcher-Rood, 2018. <sup>j</sup>Eisenberg & Guo, 2013. <sup>k</sup>Guo et al., 2019. <sup>l</sup>Hoffman, 2009. <sup>m</sup>Pavelko & Owens, 2019. <sup>n</sup>Charest et al., 2020. <sup>o</sup>Schneider et al., 2006. <sup>p</sup>Scheffel, 1997. <sup>q</sup>Heilmann et al., 2010. <sup>r</sup>Liles et al., 1995. <sup>s</sup>Klee et al., 2007. <sup>t</sup>Hewitt et al., 2005. <sup>u</sup>Dunn et al., 1996. <sup>v</sup>Fletcher & Peters, 1984. <sup>w</sup>Gavin et al., 1993. <sup>x</sup>Oetting & McDonald, 2001. <sup>y</sup>Oetting et al., 2021. <sup>z</sup>Overton et al., 2021. <sup>aa</sup>Smyk, 2012. <sup>ab</sup>Ooi & Wong, 2012.

**Table S2.** Reference measures used in reviewed studies.

| Reference measure                                                                  | Study                                                                                                                                                                                                                                                                                                                                                                                                                                                                                                                                                                                                                                                                |
|------------------------------------------------------------------------------------|----------------------------------------------------------------------------------------------------------------------------------------------------------------------------------------------------------------------------------------------------------------------------------------------------------------------------------------------------------------------------------------------------------------------------------------------------------------------------------------------------------------------------------------------------------------------------------------------------------------------------------------------------------------------|
| Clinical criterion (diagnosis by an SLP/currently receiving treatment)             | Charest et al., 2020 <sup>b</sup><br>Dunn et al., 1996<br>Gladfelter & Leonard, 2013 <sup>a</sup><br>Fletcher & Peters, 1984 <sup>b</sup><br>Gavin et al., 1993 <sup>b</sup><br>Guo & Eisenberg, 2014 <sup>b</sup><br>Guo & Schneider, 2016 <sup>b</sup><br>Guo et al., 2019 <sup>b</sup><br>Guo et al., 2020 <sup>b</sup><br>Hoffman, 2009 <sup>b</sup><br>Klee et al., 2007 <sup>b</sup><br>Pavelko & Owens, 2019 <sup>b</sup><br>Heilmann et al., 2010<br>Liles et al., 1995<br>Moyle et al., 2011 <sup>a</sup><br>Oetting & McDonald, 2001<br>Ooi & Wong, 2012<br>Overton et al., 2021<br>Schneider et al., 2006 <sup>a</sup><br>Souto et al., 2014 <sup>a</sup> |
| Clinical Evaluation of Language Fundamentals, 3rd Edition (CELF-3)                 | Charest et al., 2020<br>Guo & Schneider, 2016<br>Guo et al., 2019<br>Guo et al., 2020<br>Hoffman, 2009<br>Schneider et al., 2006 <sup>a</sup>                                                                                                                                                                                                                                                                                                                                                                                                                                                                                                                        |
| Clinical Evaluation of Language Fundamentals, 4th Edition Spanish (CELF-4 Spanish) | Smyk, 2012                                                                                                                                                                                                                                                                                                                                                                                                                                                                                                                                                                                                                                                           |
| Clinical Evaluation of Language Fundamentals, Preschool 2nd Edition (CELF-P2)      | Charest et al., 2020<br>Guo et al., 2019<br>Guo et al., 2020<br>Schneider et al., 2006                                                                                                                                                                                                                                                                                                                                                                                                                                                                                                                                                                               |
| Diagnostic Evaluation of Language Variation - Norm Referenced (DELV)               | Oetting et al., 2021                                                                                                                                                                                                                                                                                                                                                                                                                                                                                                                                                                                                                                                 |
| EpiSLI System<br>(Test of Language Development, Primary + narrative task)          | Hewitt et al., 2005                                                                                                                                                                                                                                                                                                                                                                                                                                                                                                                                                                                                                                                  |
| Preschool Language Scales, 3rd Edition (PLS-3)                                     | Bedore & Leonard, 1998                                                                                                                                                                                                                                                                                                                                                                                                                                                                                                                                                                                                                                               |
| Peabody Picture Vocabulary Test, Revised (PPVT-R)                                  | Moyle et al., 2011<br>Bedore & Leonard, 1998<br>Gavin et al., 1993<br>Oetting & McDonald, 2001<br>Rudolph et al., 2019                                                                                                                                                                                                                                                                                                                                                                                                                                                                                                                                               |
| Reynell Developmental Language Scales (Expressive)                                 | Fletcher & Peters, 1984                                                                                                                                                                                                                                                                                                                                                                                                                                                                                                                                                                                                                                              |
| Spanish-English Language Proficiency Scales (SELPS)                                | Smyk, 2012                                                                                                                                                                                                                                                                                                                                                                                                                                                                                                                                                                                                                                                           |
| Sequenced Inventory of Communication Development, Revised (SICD-R)                 | Gavin et al., 1993<br>Klee et al., 2007                                                                                                                                                                                                                                                                                                                                                                                                                                                                                                                                                                                                                              |
| Structured Photographic Expressive Language Test, 3rd Edition (SPELT-3)            | Castilla-Earls & Fulcher-Rood, 2018<br>Smyk, 2012                                                                                                                                                                                                                                                                                                                                                                                                                                                                                                                                                                                                                    |
| Structured Photographic Expressive Language Test, Preschool 2nd Edition (SPELT-P2) | Eisenberg & Guo, 2013 <sup>a</sup><br>Gladfelter et al., 2013<br>Souto et al., 2014<br>Guo & Eisenberg, 2014                                                                                                                                                                                                                                                                                                                                                                                                                                                                                                                                                         |
| Stephens Oral Language Screening Test                                              | Fletcher & Peters, 1984                                                                                                                                                                                                                                                                                                                                                                                                                                                                                                                                                                                                                                              |
| Test for Auditory Comprehension of Language, Revised (TACL-R)                      | Moyle et al., 2011                                                                                                                                                                                                                                                                                                                                                                                                                                                                                                                                                                                                                                                   |

|                                                             |                          |
|-------------------------------------------------------------|--------------------------|
| Test for Examining Expressive Morphology (TEEM)             | Bedore & Leonard, 1998   |
| Test of Language Development, Primary (TOLD-P)              | Pavelko & Owens, 2019    |
| Test of Language Development, Primary 2nd Edition (TOLD-P2) | Bedore & Leonard, 1998   |
| Grammaticality                                              | Oetting & McDonald, 2001 |
| Mean Length of Utterance (MLU)                              | Smyk, 2012               |
|                                                             | Rudolph et al., 2019     |
|                                                             | Oetting & McDonald, 2001 |
| Non-Word Repetition (NWR)                                   | Rudolph et al., 2019     |

---

*Note.* <sup>a</sup>Reference measure included clinical criterion in addition to other measures. <sup>b</sup>Clinical criterion was confirmed by standardized measures.
